# Supplementary material
Source: PubMed Central journal article supplement (PMC8314069)
Supplement: NIHMS1690950-supplement-1.pdf [file NIHMS1690950-supplement-1.pdf]

**Supplementary Table 1**

| <b>ICRS Cartilage Repair Assessment</b> |      | <b>Oswestry Arthroscopy Score</b>      |    |
|-----------------------------------------|------|----------------------------------------|----|
| Degree of defect repair                 |      | Graft level with surrounding cartilage |    |
| Level with surrounding cartilage        | 4    | Level                                  | 2  |
| 75% repair of depth                     | 3    | Rasied                                 | 1  |
| 50% repair of depth                     | 2    | Below                                  | 0  |
| 25% repair of depth                     | 1    | Integration with surrounding cartilage |    |
| 0% repair of depth                      | 0    | Complete                               | 2  |
| Integration to border zone              |      | Minor disruption (<25% of area)        | 1  |
| Complete integration                    | 4    | Major disruption (>25% of area)        | 0  |
| Demarcating border <1mm                 | 3    | Appearance of surface                  |    |
| 3/4 of graft integrated                 | 2    | Smooth                                 | 2  |
| 1/2 of graft integrated                 | 1    | Fine fronds                            | 1  |
| ≤1/4 of graft integrated                | 0    | Severe fronds/fibrillation             | 0  |
| Macroscopic <u>Appearance</u>           |      | Color of graft                         |    |
| Intact smooth surface                   | 4    | Pearly, hyaline-like                   | 2  |
| Fibrillated surface                     | 3    | White                                  | 1  |
| Small, scattered fissures or cracks     | 2    | Yellow bone                            | 0  |
| Several small or few but large fissures | 1    | Stiffness on probing                   |    |
| Total degradation of grafted area       | 0    | Normal compared to adjacent cartilage  | 2  |
| Total                                   |      | Softer                                 | 1  |
| Grade I normal                          | 12   | Very soft/hard                         | 0  |
| Grade II nearly normal                  | 8-11 | Total                                  |    |
| Grade III abnormal                      | 4-7  | Normal                                 | 10 |
| Grade IV severely abnormal              | 1-3  |                                        |    |

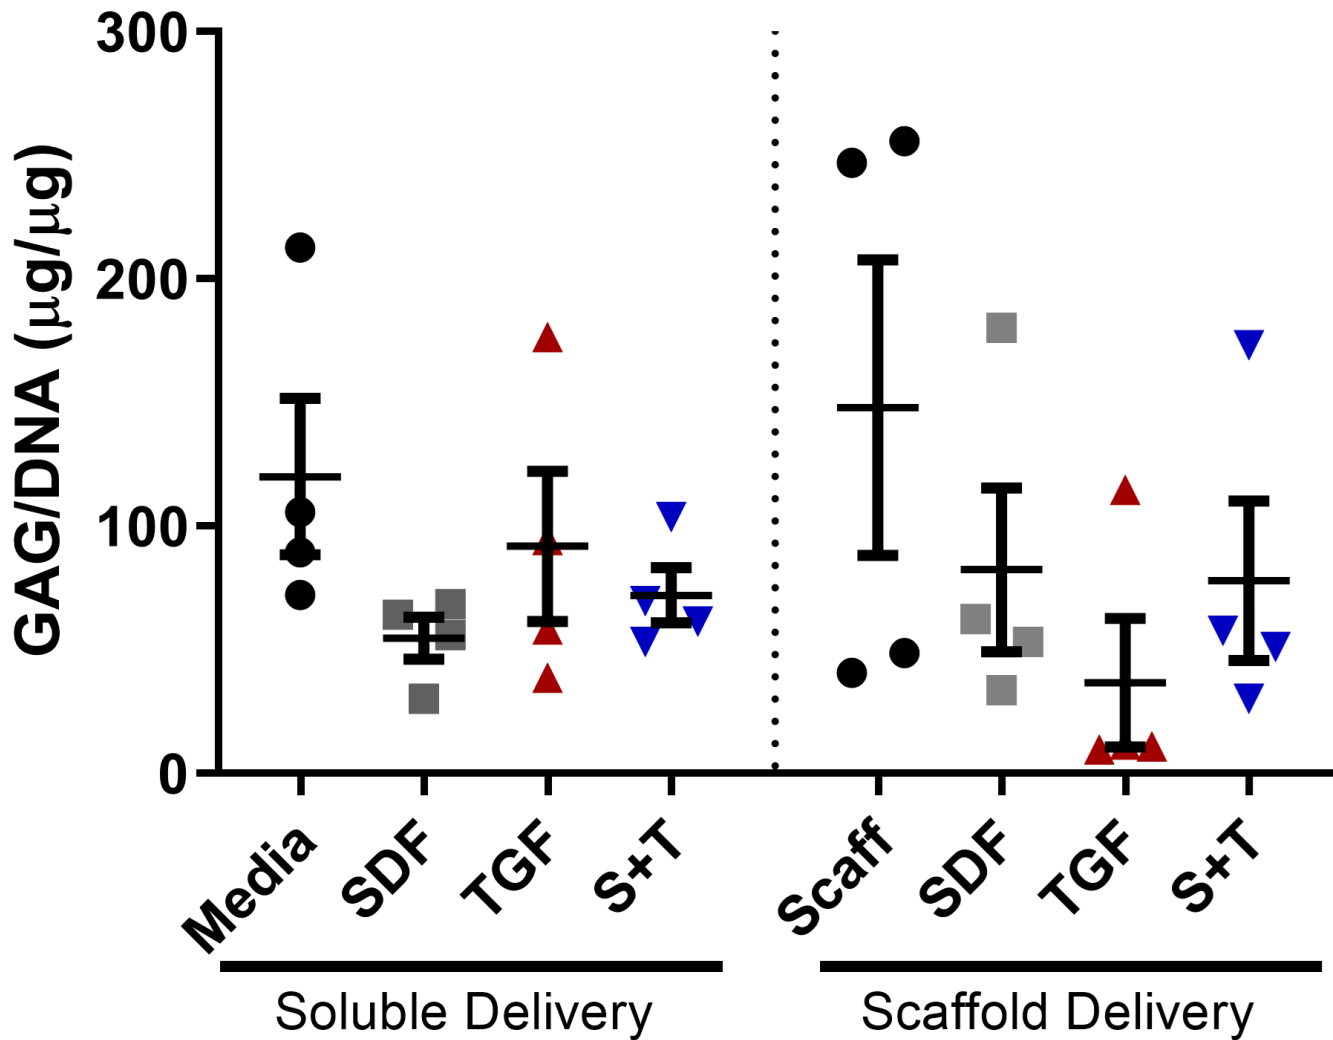

**Supplementary Figure 1 – GAG/DNA Content of MSC Pellets Co-Cultured with Scaffolds.** There was no significant difference between the groups, likely due to the small amount of DNA in SDF and control scaffolds.

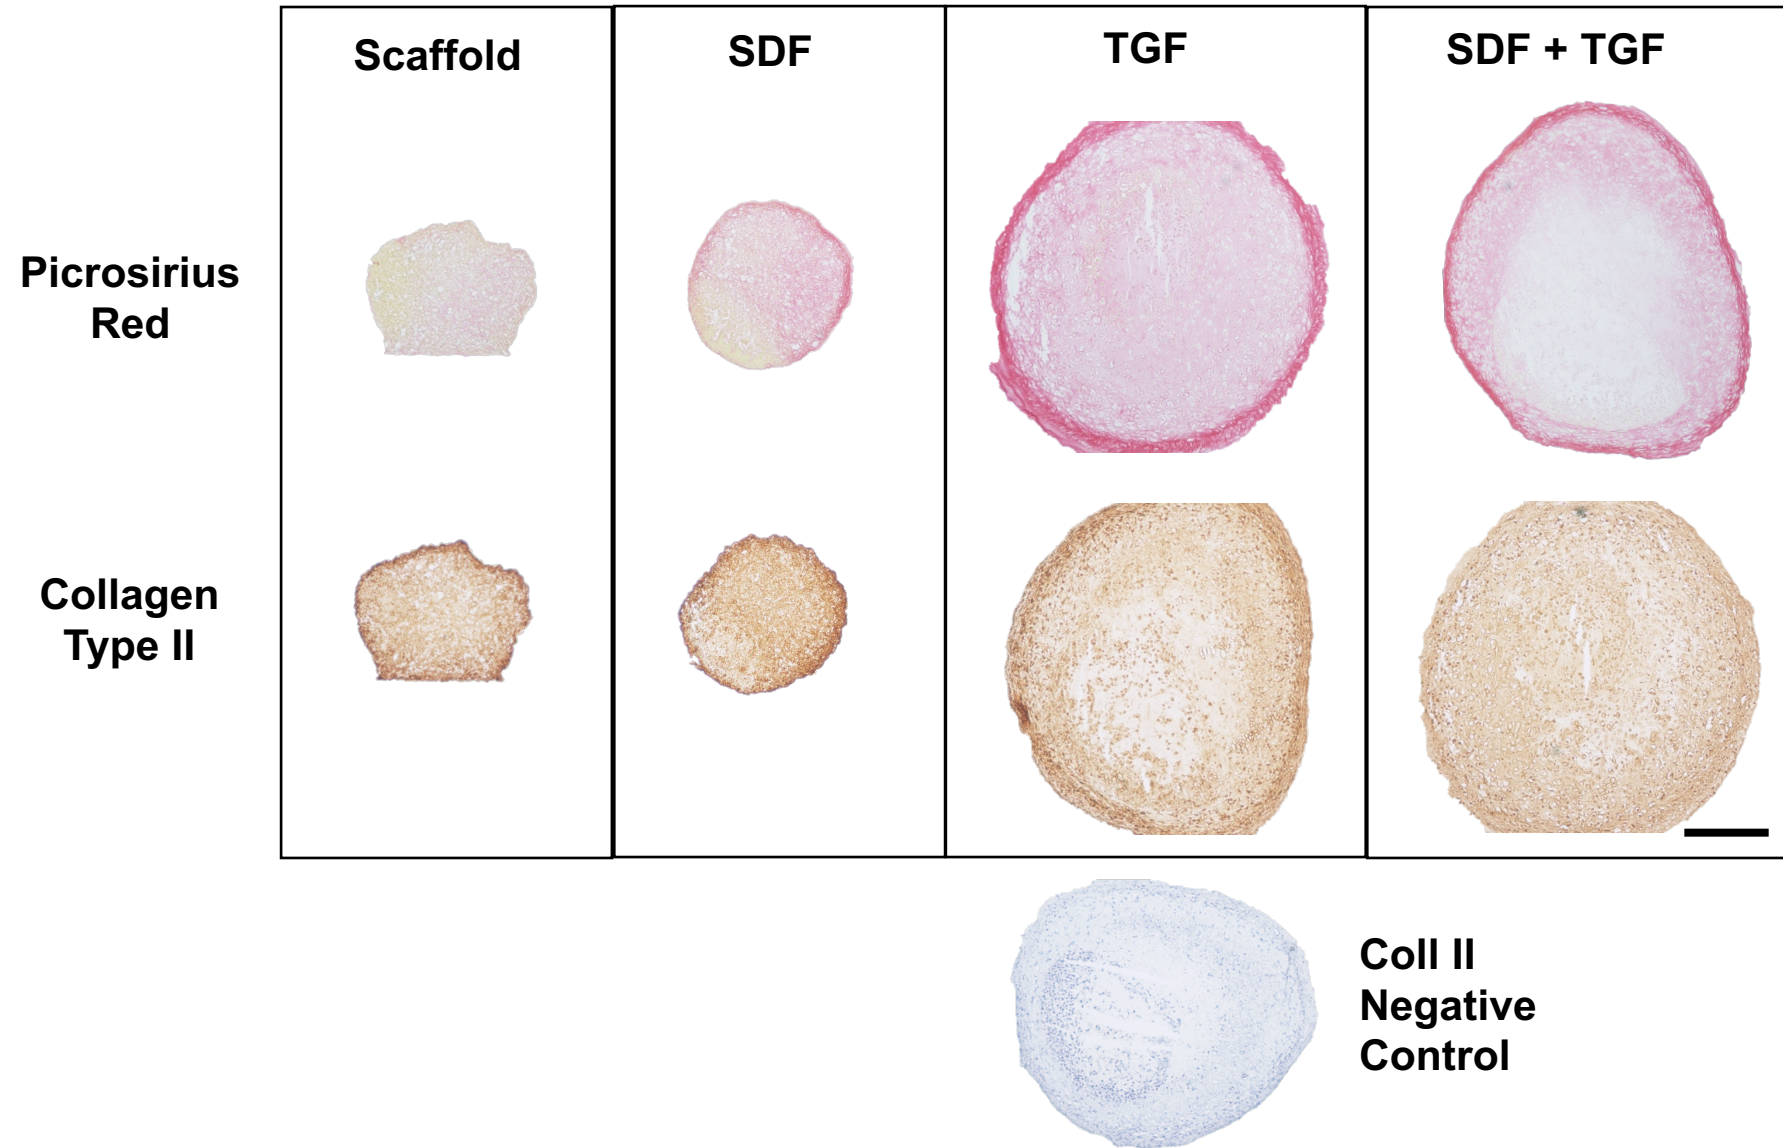

**Supplementary Figure 2 – Collagen staining of MSC Pellets co-cultured with scaffold.** All pellet groups demonstrated staining for picrosirius red and type II collagen. There was more collagen deposition in the periphery of the pellets. Scale bar = 200um

S+T

S+T

Microfracture

S+T

***Supplementary Figure 3 – Arthroscopic observations at 12 weeks post-op. Arthroscopic images showing three defects treated with the S+T group and one Mfx control within the same joint. Defect size = 4mm.***
